# Supplementary material for: The panzootic potential of SARS-CoV-2
Source: PubMed Central journal article supplement — Bioscience. 2023 Dec 18;73(11):814–29. doi: 10.1093/biosci/biad102 (PMC10728779; doi:10.1093/biosci/biad102), 2023-12-18
Supplement: biad102_supplemental_file.pdf [file biad102_supplemental_file.pdf]

## Supplementary materials

**TABLE S1.** Database used to map the spatial distribution of SARS-CoV-2 natural infection.

| Country                             | Species                       |
|-------------------------------------|-------------------------------|
| Argentina <sup>1</sup>              | <i>Canis familiaris</i>       |
|                                     | <i>Felis catus</i>            |
|                                     | <i>Puma concolor</i>          |
|                                     | <i>Panthera tigris</i>        |
| Belgium <sup>1</sup>                | <i>Hippopotamus amphibius</i> |
|                                     | <i>Felis catus</i>            |
| Bosnia and Herzegovina <sup>1</sup> | <i>Canis familiaris</i>       |
| Brazil <sup>1</sup>                 | <i>Felis catus</i>            |
|                                     | <i>Canis familiaris</i>       |
| Canada <sup>1</sup>                 | <i>Neovison vison</i>         |
|                                     | <i>Odocoileus virginianus</i> |
|                                     | <i>Felis catus</i>            |
|                                     | <i>Canis familiaris</i>       |
| Czech Rep                           | <i>Gorilla gorilla</i>        |
|                                     | <i>Panthera leo</i>           |
| Chile <sup>1</sup>                  | <i>Felis catus</i>            |
| Colombia <sup>1</sup>               | <i>Panthera leo</i>           |
|                                     | <i>Panthera leo</i>           |
| Croatia <sup>1</sup>                | <i>Felis lynx</i>             |
|                                     | <i>Canis familiaris</i>       |
|                                     | <i>Felis catus</i>            |
|                                     | <i>Panthera tigris</i>        |
| Denmark <sup>1</sup>                | <i>Neovison vison</i>         |
|                                     | <i>Felis catus</i>            |
| Ecuador                             | <i>Canis familiaris</i>       |
|                                     | <i>Felis catus</i>            |
| Estonia <sup>1</sup>                | <i>Panthera leo</i>           |
|                                     | <i>Felis catus</i>            |
| Finland <sup>1</sup>                | <i>Felis catus</i>            |
| France <sup>1</sup>                 | <i>Neovison vison</i>         |
|                                     | <i>Felis catus</i>            |
| Germany <sup>1</sup>                | <i>Felis catus</i>            |
|                                     | <i>Canis familiaris</i>       |
| Greece <sup>1</sup>                 | <i>Neovison vison</i>         |
|                                     | <i>Felis catus</i>            |
| China <sup>1</sup>                  | <i>Felis catus</i>            |
|                                     | <i>Canis familiaris</i>       |
|                                     | <i>Mesocricetus auratus</i>   |
| India <sup>2,3</sup>                | <i>Panthera pardus</i>        |
|                                     | <i>Panthera leo</i>           |
| Indonesia <sup>1</sup>              | <i>Panthera tigris</i>        |
|                                     | <i>Neovison vison</i>         |
| Italy <sup>1</sup>                  | <i>Felis catus</i>            |
|                                     | <i>Canis familiaris</i>       |
| Japan <sup>1</sup>                  | <i>Felis catus</i>            |
|                                     | <i>Felis catus</i>            |
| Korea                               | <i>Felis catus</i>            |
| Latvia <sup>1</sup>                 | <i>Neovison vison</i>         |
|                                     | <i>Felis catus</i>            |
| Lithuania <sup>1</sup>              | <i>Neovison vison</i>         |

|                                       |                                |
|---------------------------------------|--------------------------------|
| Mongolia                              | <i>Castor fiber birulai</i>    |
|                                       | <i>Felis catus</i>             |
| Mexico <sup>1</sup>                   | <i>Canis familiaris</i>        |
| Myanmar <sup>1</sup>                  | <i>Canis familiaris</i>        |
| Netherlands                           | <i>Gorilla gorilla</i>         |
|                                       | <i>Panthera leo</i>            |
| Pakistan                              | <i>Panthera tigris</i>         |
| Poland <sup>1</sup>                   | <i>Neovison vison</i>          |
| Russia <sup>1</sup>                   | <i>Felis catus</i>             |
| Singapore <sup>1</sup>                | <i>Panthera leo</i>            |
| Slovenia <sup>1</sup>                 | <i>Mustela furo</i>            |
|                                       | <i>Neovison vison</i>          |
| South Africa <sup>1</sup>             | <i>Panthera leo</i>            |
|                                       | <i>Puma concolor</i>           |
| Spain <sup>1</sup>                    | <i>Neovison vison</i>          |
|                                       | <i>Panthera leo</i>            |
|                                       | <i>Felis catus</i>             |
|                                       | <i>Mustela furo</i>            |
| Sri Lanka                             | <i>Canis familiaris</i>        |
|                                       | <i>Pan troglodytes</i>         |
| Sweden <sup>1</sup>                   | <i>Pongo sp</i>                |
|                                       | <i>Neovison vison</i>          |
| Switzerland <sup>1</sup>              | <i>Panthera leo</i>            |
|                                       | <i>Panthera tigris</i>         |
|                                       | <i>Canis familiaris</i>        |
| Thailand <sup>1</sup>                 | <i>Canis familiaris</i>        |
|                                       | <i>Felis catus</i>             |
| United Kingdom <sup>1</sup>           | <i>Felis catus</i>             |
|                                       | <i>Canis familiaris</i>        |
|                                       | <i>Panthera tigris</i>         |
|                                       | <i>Panthera tigris</i>         |
| United States of America <sup>1</sup> | <i>Felis catus</i>             |
|                                       | <i>Canis familiaris</i>        |
|                                       | <i>Panthera leo</i>            |
|                                       | <i>Lynx canadensis</i>         |
|                                       | <i>Crocuta crocuta</i>         |
|                                       | <i>Panthera uncia</i>          |
|                                       | <i>Prionailurus viverrinus</i> |
|                                       | <i>Arctictis binturong</i>     |
|                                       | <i>Nasua nasua</i>             |
|                                       | <i>Gorilla gorilla</i>         |
|                                       | <i>Neovison vison</i>          |
|                                       | <i>Aonyx cinereus</i>          |
|                                       | <i>Odocoileus virginianus</i>  |
| <i>Puma concolor</i>                  |                                |
| Uruguay <sup>1</sup>                  | <i>Canis familiaris</i>        |
|                                       | <i>Felis catus</i>             |

**TABLE S2.** Breakdown of the genome sequences obtained from GISAID from animal infections in country and lineage/variant.

| Country                | 20E (EU1) | A  | Alpha | B | B.1 | B.1.1 | B.1.1.298 | B.1.1.464 | B.1.2 | B.1.22 | B.1.234 | B.1.311 | B.1.536 | B.1.8 | B.11 | Delta | Omicron (BA.1) | Other |
|------------------------|-----------|----|-------|---|-----|-------|-----------|-----------|-------|--------|---------|---------|---------|-------|------|-------|----------------|-------|
| Argentina              | 0         | 0  | 1     | 0 | 0   | 0     | 0         | 0         | 0     | 0      | 0       | 0       | 0       | 0     | 0    | 0     | 0              | 3     |
| Austria                | 0         | 0  | 0     | 0 | 0   | 0     | 0         | 0         | 0     | 0      | 0       | 0       | 0       | 0     | 0    | 0     | 0              | 0     |
| Belarus                | 0         | 0  | 0     | 0 | 3   | 0     | 0         | 0         | 0     | 0      | 0       | 0       | 0       | 0     | 0    | 0     | 0              | 0     |
| Belgium                | 0         | 0  | 0     | 0 | 1   | 0     | 0         | 0         | 0     | 0      | 0       | 0       | 0       | 0     | 0    | 2     | 0              | 0     |
| Bosnia_and_Herzegovina | 0         | 0  | 1     | 0 | 0   | 0     | 0         | 0         | 0     | 0      | 0       | 0       | 0       | 0     | 0    | 0     | 0              | 2     |
| Botswana               | 0         | 0  | 0     | 0 | 0   | 0     | 0         | 0         | 0     | 0      | 0       | 0       | 0       | 0     | 0    | 1     | 0              | 0     |
| Brazil                 | 0         | 14 | 0     | 0 | 0   | 0     | 0         | 0         | 0     | 0      | 0       | 0       | 0       | 0     | 0    | 0     | 0              | 2     |
| Canada                 | 0         | 0  | 0     | 0 | 0   | 0     | 0         | 0         | 0     | 0      | 0       | 0       | 0       | 0     | 0    | 0     | 0              | 5     |
| China                  | 0         | 1  | 0     | 2 | 0   | 0     | 0         | 0         | 0     | 0      | 0       | 0       | 0       | 0     | 0    | 0     | 0              | 1     |
| Colombia               | 0         | 2  | 0     | 0 | 0   | 0     | 0         | 0         | 0     | 0      | 0       | 0       | 0       | 0     | 0    | 0     | 0              | 2     |
| Croatia                | 0         | 0  | 0     | 0 | 0   | 1     | 0         | 0         | 0     | 0      | 0       | 0       | 0       | 0     | 0    | 0     | 0              | 1     |
| Czech_Republic         | 0         | 0  | 5     | 0 | 0   | 0     | 0         | 0         | 0     | 0      | 0       | 0       | 0       | 0     | 0    | 0     | 0              | 0     |
| Denmark                | 0         | 0  | 0     | 0 | 5   | 0     | 437       | 0         | 3     | 0      | 0       | 0       | 11      | 0     | 0    | 0     | 0              | 15    |
| Egypt                  | 0         | 7  | 0     | 0 | 0   | 0     | 0         | 0         | 0     | 0      | 0       | 0       | 0       | 0     | 0    | 0     | 0              | 0     |
| England                | 0         | 0  | 0     | 0 | 0   | 1     | 0         | 0         | 0     | 0      | 0       | 0       | 0       | 0     | 0    | 0     | 0              | 0     |

|             |    |   |   |   |   |    |   |   |   |    |   |   |   |     |    |   |    |    |   |
|-------------|----|---|---|---|---|----|---|---|---|----|---|---|---|-----|----|---|----|----|---|
| France      | 0  | 1 | 1 | 0 | 1 | 1  | 0 | 0 | 0 | 0  | 0 | 0 | 0 | 0   | 0  | 0 | 0  | 0  | 5 |
| Germany     | 0  | 0 | 1 | 0 | 4 | 0  | 0 | 0 | 0 | 0  | 0 | 0 | 0 | 0   | 0  | 0 | 0  | 0  | 0 |
| Greece      | 0  | 0 | 0 | 0 | 0 | 1  | 0 | 0 | 0 | 0  | 0 | 0 | 0 | 0   | 0  | 0 | 0  | 0  | 0 |
| Hong_Kong   | 0  | 3 | 0 | 0 | 1 | 1  | 0 | 0 | 0 | 0  | 0 | 0 | 0 | 0   | 0  | 0 | 12 | 0  | 1 |
| India       | 0  | 0 | 0 | 0 | 1 | 0  | 0 | 0 | 0 | 0  | 0 | 0 | 0 | 0   | 0  | 0 | 5  | 12 | 0 |
| Iran        | 0  | 1 | 0 | 0 | 0 | 0  | 0 | 0 | 0 | 0  | 0 | 0 | 0 | 0   | 0  | 0 | 0  | 0  | 0 |
| Italy       | 2  | 0 | 1 | 0 | 0 | 0  | 0 | 0 | 0 | 0  | 0 | 0 | 0 | 0   | 0  | 0 | 0  | 0  | 0 |
| Japan       | 0  | 0 | 0 | 0 | 0 | 0  | 0 | 0 | 0 | 0  | 0 | 0 | 0 | 0   | 0  | 0 | 1  | 0  | 2 |
| Latvia      | 62 | 0 | 1 | 0 | 0 | 0  | 0 | 3 | 0 | 0  | 0 | 0 | 0 | 0   | 0  | 0 | 1  | 0  | 2 |
| Lithuania   | 0  | 0 | 0 | 0 | 0 | 0  | 0 | 4 | 0 | 0  | 0 | 0 | 0 | 0   | 0  | 0 | 0  | 0  | 3 |
| Netherlands | 1  | 0 | 0 | 2 | 5 | 0  | 0 | 0 | 0 | 68 | 0 | 0 | 0 | 167 | 44 | 4 | 0  | 0  | 2 |
| Peru        | 0  | 0 | 0 | 0 | 0 | 0  | 0 | 0 | 0 | 0  | 0 | 0 | 0 | 0   | 0  | 0 | 0  | 0  | 3 |
| Poland      | 0  | 0 | 0 | 0 | 0 | 12 | 0 | 4 | 0 | 0  | 0 | 0 | 0 | 0   | 0  | 8 | 0  | 0  | 0 |
| Portugal    | 0  | 1 | 0 | 0 | 0 | 0  | 0 | 0 | 0 | 0  | 0 | 0 | 0 | 0   | 0  | 0 | 0  | 0  | 0 |
| Puerto_Rico | 0  | 0 | 0 | 0 | 0 | 0  | 0 | 0 | 0 | 0  | 0 | 0 | 0 | 0   | 0  | 0 | 2  | 0  | 0 |
| Russia      | 0  | 0 | 0 | 0 | 0 | 0  | 0 | 0 | 0 | 0  | 0 | 0 | 0 | 0   | 0  | 0 | 0  | 0  | 4 |
| Singapore   | 0  | 0 | 0 | 0 | 0 | 0  | 0 | 0 | 0 | 0  | 0 | 0 | 0 | 0   | 0  | 0 | 1  | 0  | 0 |
| Slovenia    | 0  | 0 | 0 | 0 | 0 | 0  | 0 | 0 | 0 | 0  | 0 | 0 | 0 | 0   | 0  | 0 | 0  | 0  | 1 |

|                |    |   |    |   |     |   |   |   |    |   |    |    |   |   |   |     |   |    |   |
|----------------|----|---|----|---|-----|---|---|---|----|---|----|----|---|---|---|-----|---|----|---|
| South_Africa   | 0  | 0 | 0  | 0 | 0   | 0 | 0 | 0 | 0  | 0 | 0  | 0  | 0 | 0 | 0 | 0   | 3 | 0  | 0 |
| Spain          | 12 | 5 | 0  | 0 | 5   | 0 | 0 | 0 | 0  | 0 | 0  | 0  | 0 | 0 | 0 | 0   | 1 | 0  | 0 |
| Sri_Lanka      | 0  | 0 | 0  | 0 | 0   | 0 | 0 | 0 | 0  | 0 | 0  | 0  | 0 | 0 | 0 | 0   | 0 | 0  | 0 |
| Sweden         | 3  | 0 | 0  | 0 | 0   | 0 | 0 | 0 | 0  | 0 | 0  | 0  | 0 | 0 | 0 | 0   | 0 | 0  | 0 |
| Switzerland    | 0  | 0 | 0  | 0 | 0   | 0 | 0 | 0 | 0  | 0 | 0  | 0  | 0 | 0 | 0 | 0   | 3 | 0  | 5 |
| Thailand       | 0  | 0 | 3  | 0 | 0   | 0 | 0 | 0 | 0  | 0 | 0  | 0  | 0 | 0 | 0 | 0   | 2 | 0  | 0 |
| United_Kingdom | 0  | 0 | 0  | 0 | 0   | 0 | 0 | 0 | 0  | 0 | 0  | 0  | 0 | 0 | 0 | 0   | 0 | 0  | 0 |
| USA            | 0  | 2 | 14 | 8 | 158 | 2 | 0 | 0 | 78 | 0 | 12 | 21 | 0 | 0 | 0 | 126 | 4 | 47 |   |

---

**TABLE S3.** *Host distribution across continents.*

| Host         | America | Africa | Europe | Asia |
|--------------|---------|--------|--------|------|
| binturong    | 1       | 0      | 0      | 0    |
| cat          | 66      | 5      | 35     | 10   |
| coati        | 1       | 0      | 0      | 0    |
| deer         | 138     | 0      | 0      | 0    |
| dog          | 47      | 3      | 18     | 5    |
| ferret       | 1       | 0      | 0      | 0    |
| fishing cat  | 1       | 0      | 0      | 0    |
| gorilla      | 9       | 0      | 6      | 0    |
| hamster      | 0       | 0      | 0      | 29   |
| hippo        | 0       | 0      | 1      | 0    |
| hyena        | 1       | 0      | 0      | 0    |
| leopard      | 0       | 0      | 1      | 0    |
| lion         | 38      | 3      | 22     | 10   |
| mink         | 144     | 0      | 862    | 0    |
| monkey       | 4       | 0      | 0      | 0    |
| mouse        | 1       | 0      | 1      | 3    |
| otter        | 8       | 0      | 0      | 0    |
| puma         | 1       | 0      | 0      | 0    |
| snow leopard | 11      | 0      | 0      | 0    |
| tiger        | 39      | 0      | 2      | 0    |

**TABLE S4.** *Summary of trait data used for ancestral character mapping.*

| <b>Infection</b>            | <b>Species Count</b> | <b>Family Count</b> |
|-----------------------------|----------------------|---------------------|
| Experimental                | 26                   | 11                  |
| Natural                     | 22                   | 8                   |
| Both Experimental + Natural | NA                   | 3                   |

  

| <b>ACE2 conservation</b> | <b>Species Count</b> | <b>Family Count</b> |
|--------------------------|----------------------|---------------------|
| Very High                | 19                   | 2                   |
| High                     | 27                   | 12                  |
| Medium                   | 56                   | 17                  |
| Low                      | 47                   | 19                  |
| Very Low                 | 99                   | 41                  |
| Mixed State              | NA                   | 10                  |

**TABLE S5.** *AIC scores for model selection for ancestral state reconstructions. Bold numbers indicate the model used for analyses. The same model was used for both simmap and ace methods of reconstruction.*

| <b>Analysis</b> | <b>Equal Rates (ER)</b> | <b>Symmetric (SYM)</b> | <b>All-rates- different (ARD)</b> |
|-----------------|-------------------------|------------------------|-----------------------------------|
| Species level   | 2944.304                | 2932.392               | <b>2600.044</b>                   |
| Family level    | <b>599.6598</b>         | 769.4932               | 764.2774                          |
| Felidae only    | 42.85952                | 42.85952               | <b>41.22131</b>                   |



A

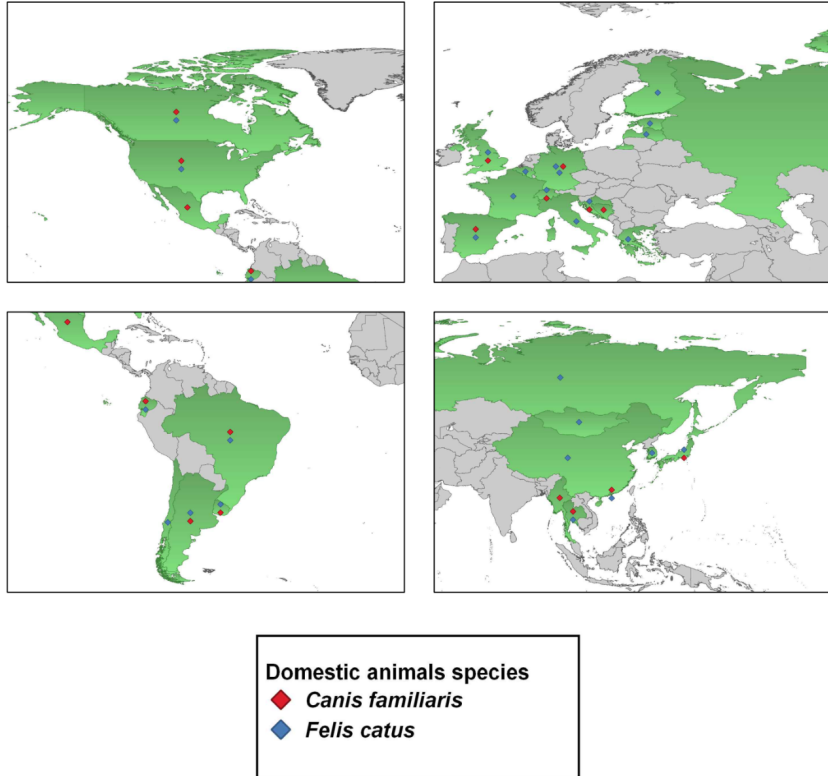

B

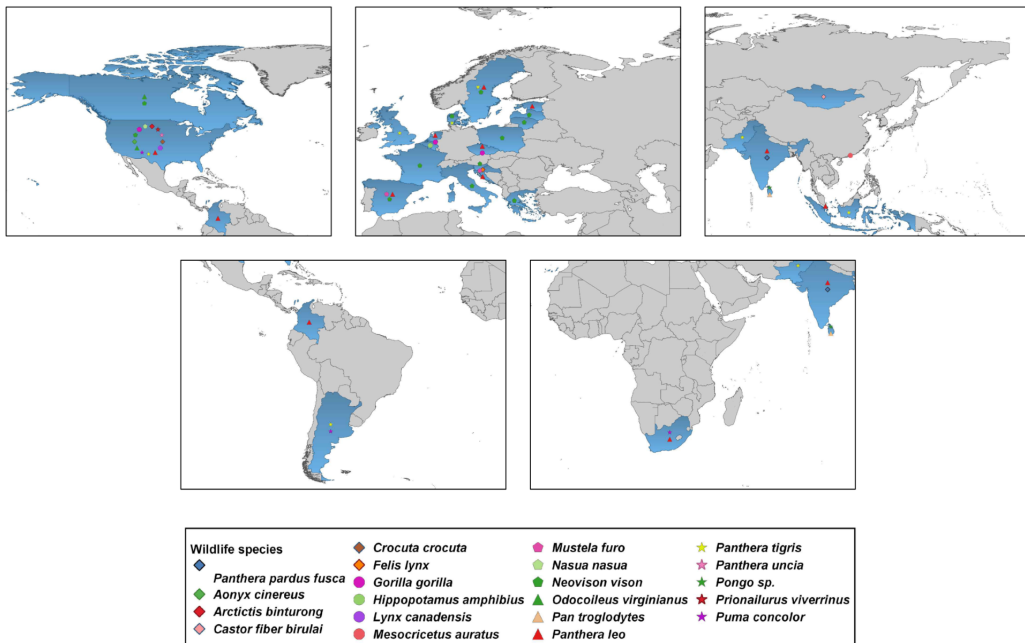

**Figure S1:** Spatial distribution of SARS-CoV-2 of A) natural infection in domestic animals and B) natural infection in wildlife.

**ACE2 Receptor**  
■ Very High  
■ High  
■ Medium  
■ Low  
■ Very Low  
■ No Data

**Infection**  
○ Natural  
○ Experimental - Susceptible  
○ Experimental - Not Susceptible

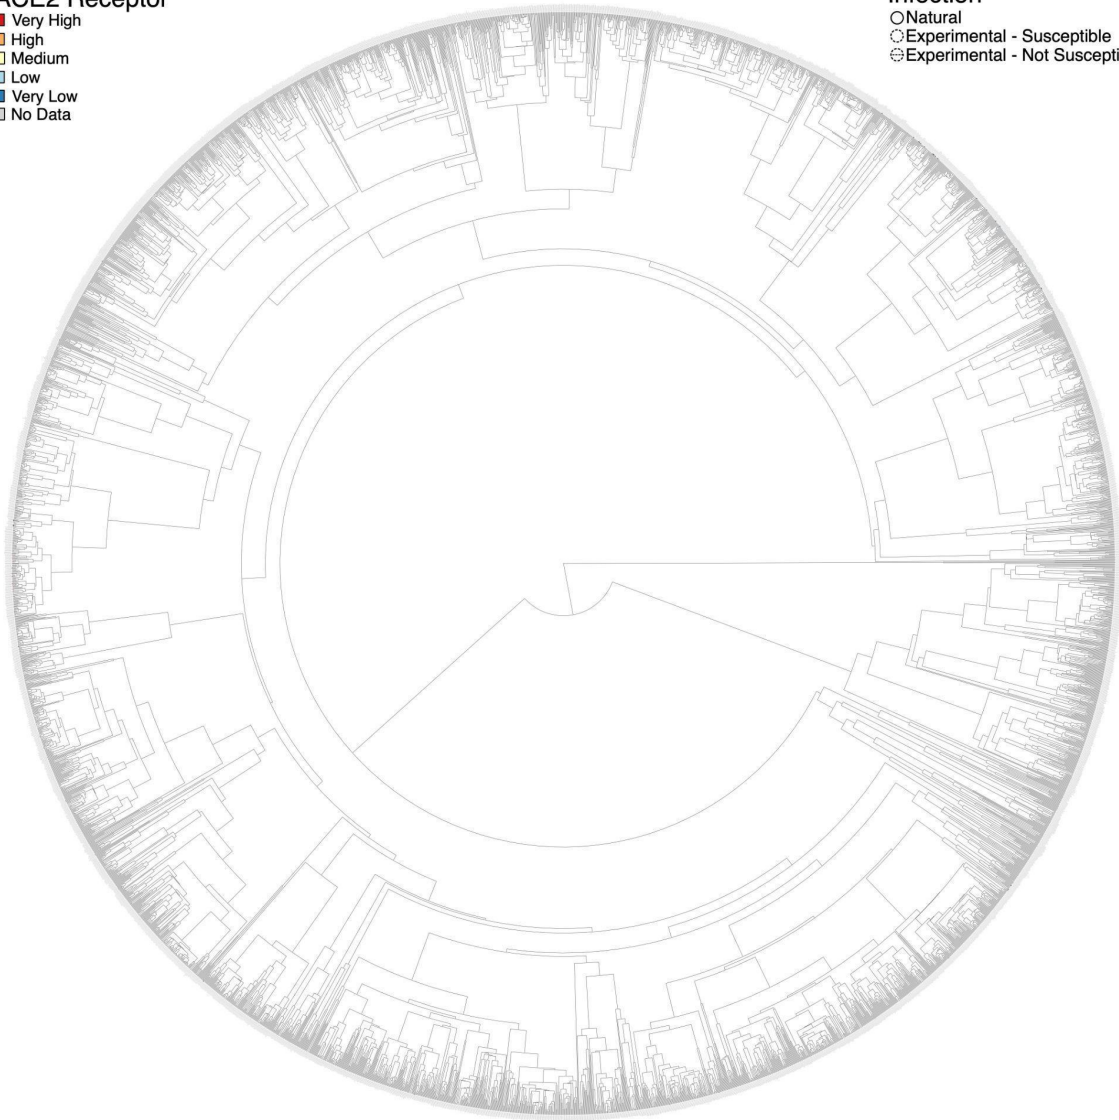

**Figure S2:** Stochastic character mapping of ACE2 receptor conservation with SARS-CoV-2 infection secondarily mapped at tips. Phylogeny limited to just mammal species with DNA and time-scaled using node dating (TopoFree\_ND; Upham et al. 2019).

### ACE2 Receptor

- Very High
- High
- Medium
- Low
- Very Low
- No Data

### Infection

- Natural
- Experimental - Susceptible
- Experimental - Not Susceptible

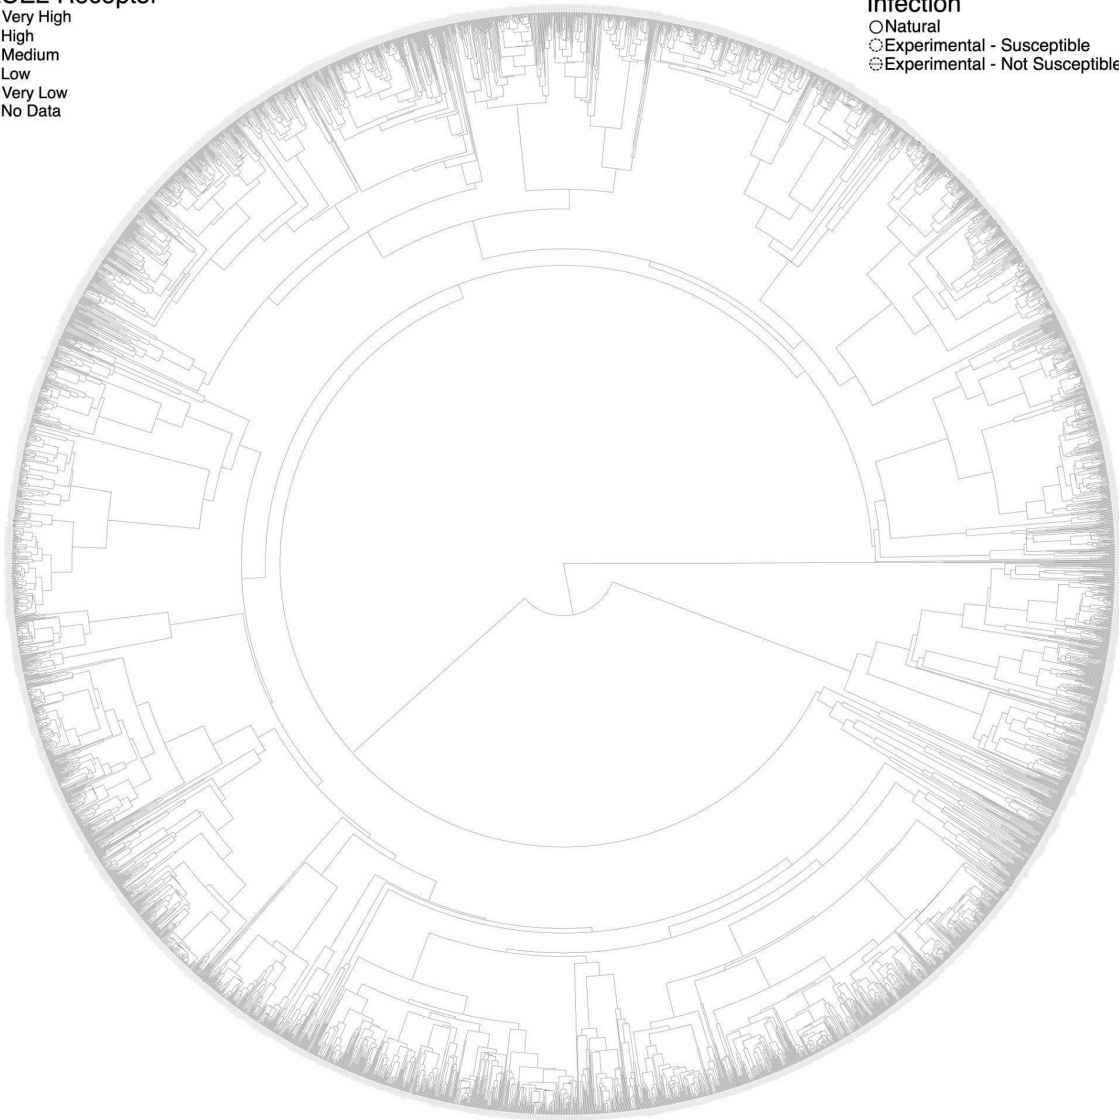

**Figure S3:** Ancestral character estimation of ACE2 receptor conservation with SARS-CoV-2 infection secondarily mapped at tips. Phylogeny limited to just mammal species with DNA and time-scaled using node dating (TopoFree\_ND; Upham et al. 2019).

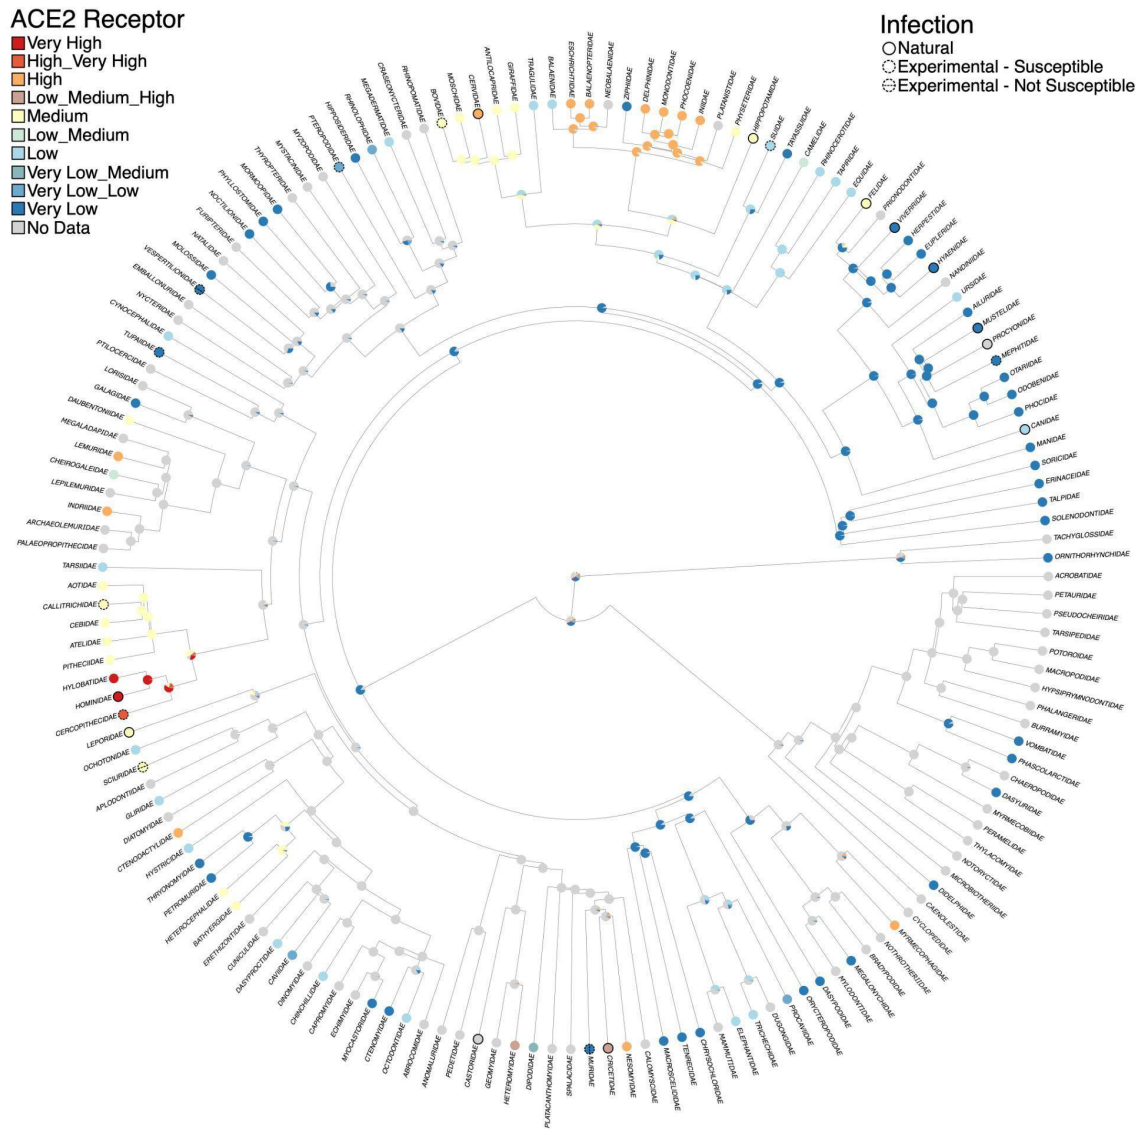

**Figure S4:** Ancestral character estimation of ACE2 receptor conservation with SARS-CoV-2 infection secondarily mapped at tips. Phylogeny limited to just mammal families with DNA and time-scaled using node dating (TopoFree\_ND; Upham et al. 2019).

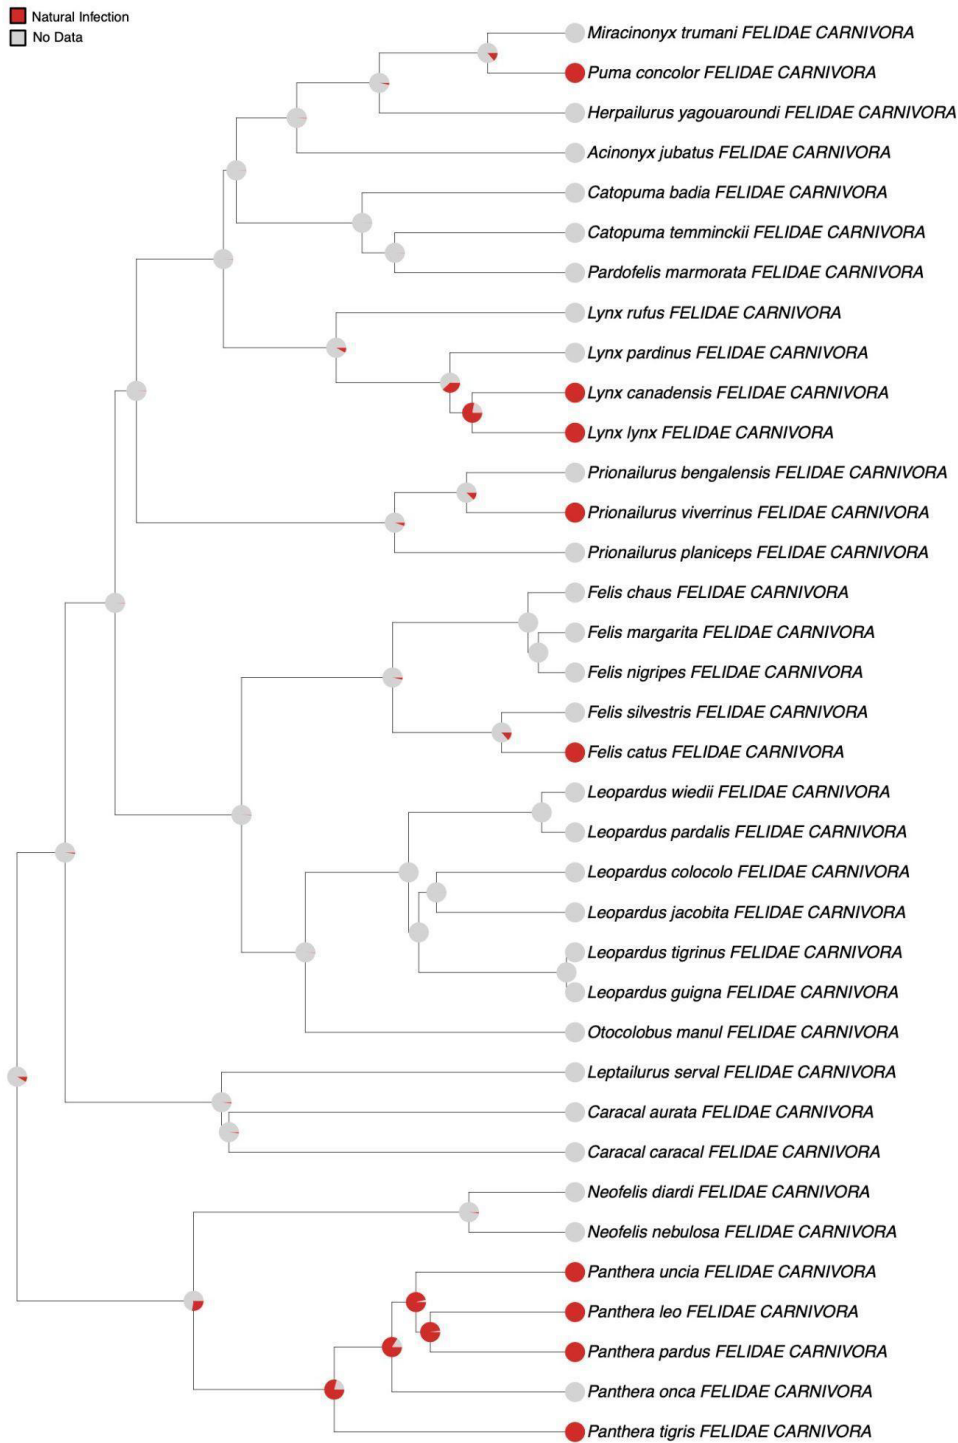

**Figure S5:** Stochastic character mapping of SARS-CoV-2 infection for the Felidae (cats).

Phylogeny limited to just species with DNA and time-scaled using node dating

(TopoFree\_ND; Upham et al. 2019).



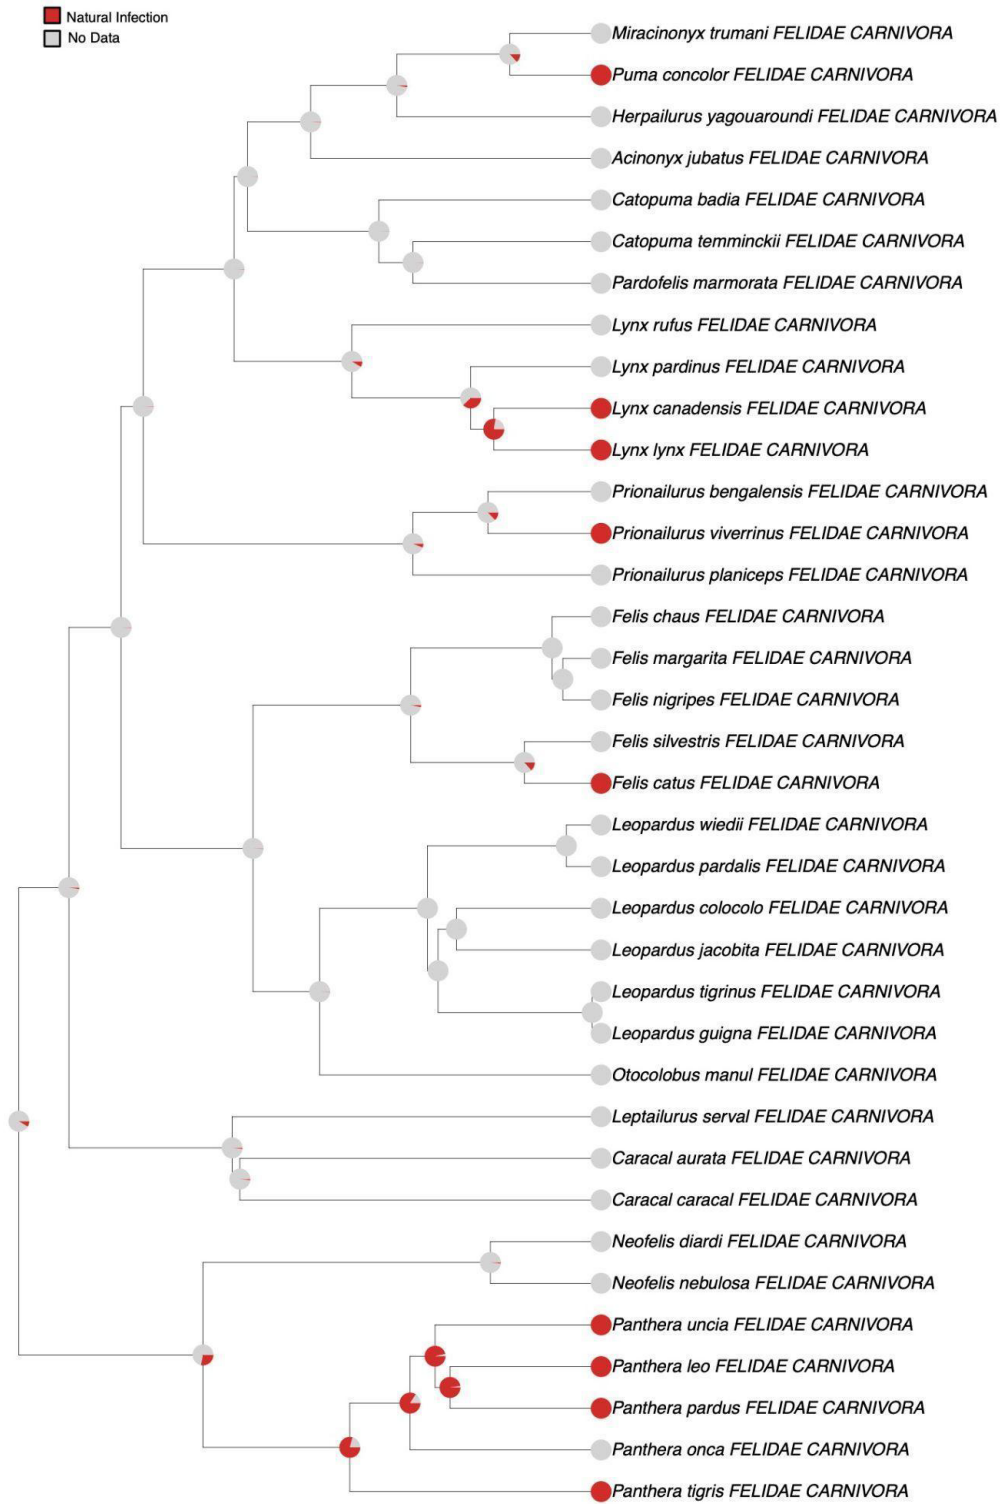

**Figure S6:** Ancestral character estimation SARS-CoV-2 infection for the Felidae (cats).

Phylogeny limited to just species with DNA and time-scaled using node dating

(TopoFree\_ND; Upham et al. 2019).
